# Supplementary material for: A monolithic microfluidic probe for ambient mass spectrometry imaging of biological tissues
Source: Royal Society of Chemistry journal article supplement (doi:10.1039/d3lc00637a), 2023-01-01
Supplement: d3lc00637a1.pdf [file d3lc00637a1.pdf]

## Supplementary Materials

### **A monolithic microfluidic probe for ambient mass spectrometry imaging of biological tissues**

Li-Xue Jiang<sup>‡1</sup>, Matthias Polack<sup>‡2</sup>, Xiangtang Li<sup>1</sup>, Manxi Yang<sup>1</sup>, Detlev Belder<sup>2,\*</sup>, Julia Laskin<sup>1,\*</sup>

<sup>1</sup>Department of Chemistry, Purdue University, West Lafayette, IN, 47907, United States

<sup>2</sup>Institute of Analytical Chemistry, Leipzig University, Leipzig, 04103, Germany.

E-mail: [jlaskin@purdue.edu](mailto:jlaskin@purdue.edu); [belder@uni-leipzig.de](mailto:belder@uni-leipzig.de)

<sup>‡</sup> These authors contributed equally

#### Table of Contents

|                                                                                                                                                                      |    |
|----------------------------------------------------------------------------------------------------------------------------------------------------------------------|----|
| Figure S1. Photographs of the liquid bridge generated by first generation SLE-MFP before and after polishing the sampling port.....                                  | S2 |
| Figure S2 Optical and representative positive ion images of the mouse uterine tissue obtained using SLE-MFP at a scan rate of 250 $\mu\text{m}/\text{s}$ .....       | S3 |
| Figure S3 The spatial resolution of V-shaped SLE-MFP nano-DESI MSI determined using the “20-80 rule”.....                                                            | S4 |
| Figure S4 Optical and representative positive ion images of the mouse brain tissue obtained using V-shape SLE-MFP at a scan rate of 200 $\mu\text{m}/\text{s}$ ..... | S5 |

No polishing

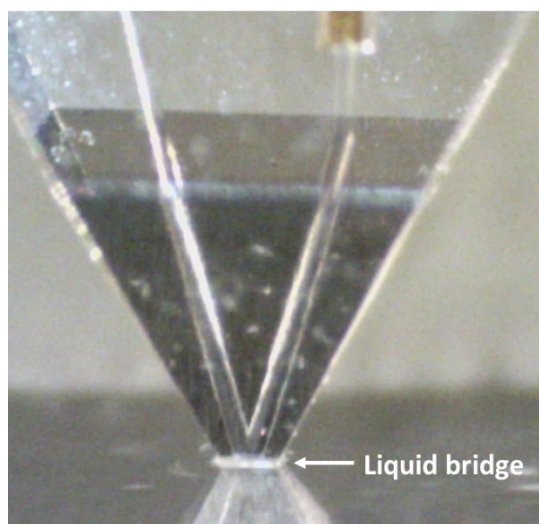

Polished

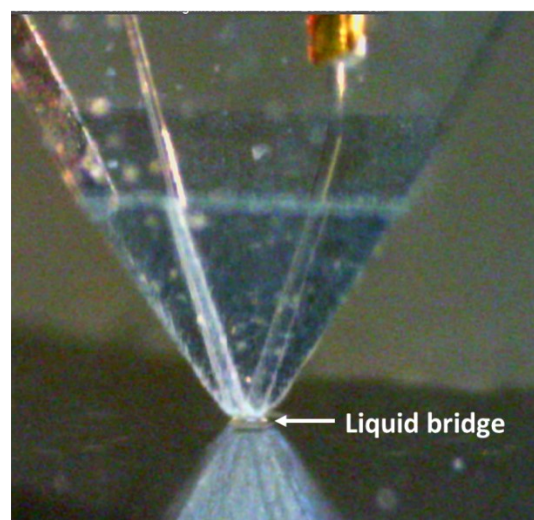

**Figure S1.** Photographs of the liquid bridge generated by first generation SLE-MFP before and after polishing the sampling port.

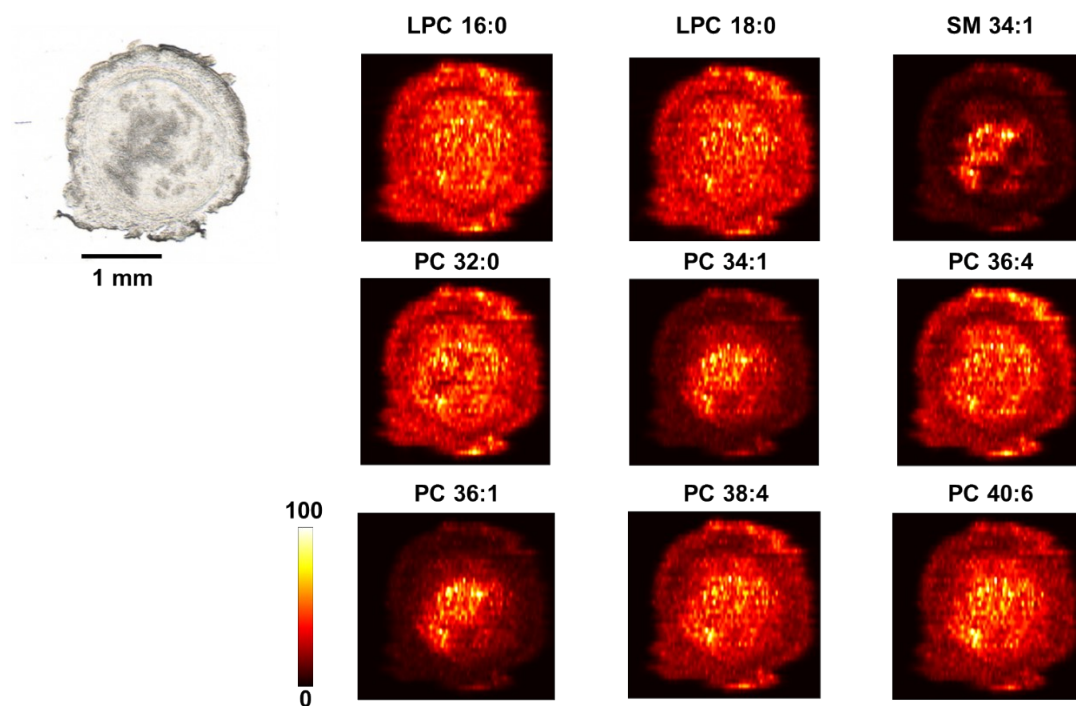

**Figure S2.** Optical and representative positive mode ion images of  $[M+Na]^+$  ions of phospholipids in mouse uterine tissues obtained using SLE-MFP. Scale bar: 1 mm; the intensity scale: black (low), yellow (high). The scan rate is  $250 \mu\text{m/s}$  and the step between lines is  $60 \mu\text{m}$ . The acquisition rate of MS is 10 Hz. The ion images are normalized to the internal standard.

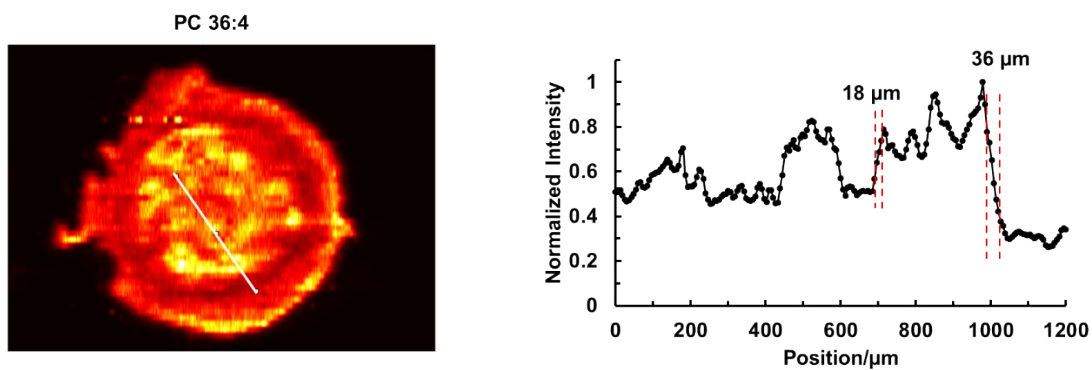

**Figure S3.** The spatial resolution of V-shaped SLE-MFP nano-DESI MSI determined using the “20-80 rule”. Left: the ion image of  $[\text{PC } 36:4 + \text{Na}]^+$  with the line scan shown in white. Right: Signal profile along the line scan. The gradient used to estimate the spatial resolution is shown with dashed red lines.

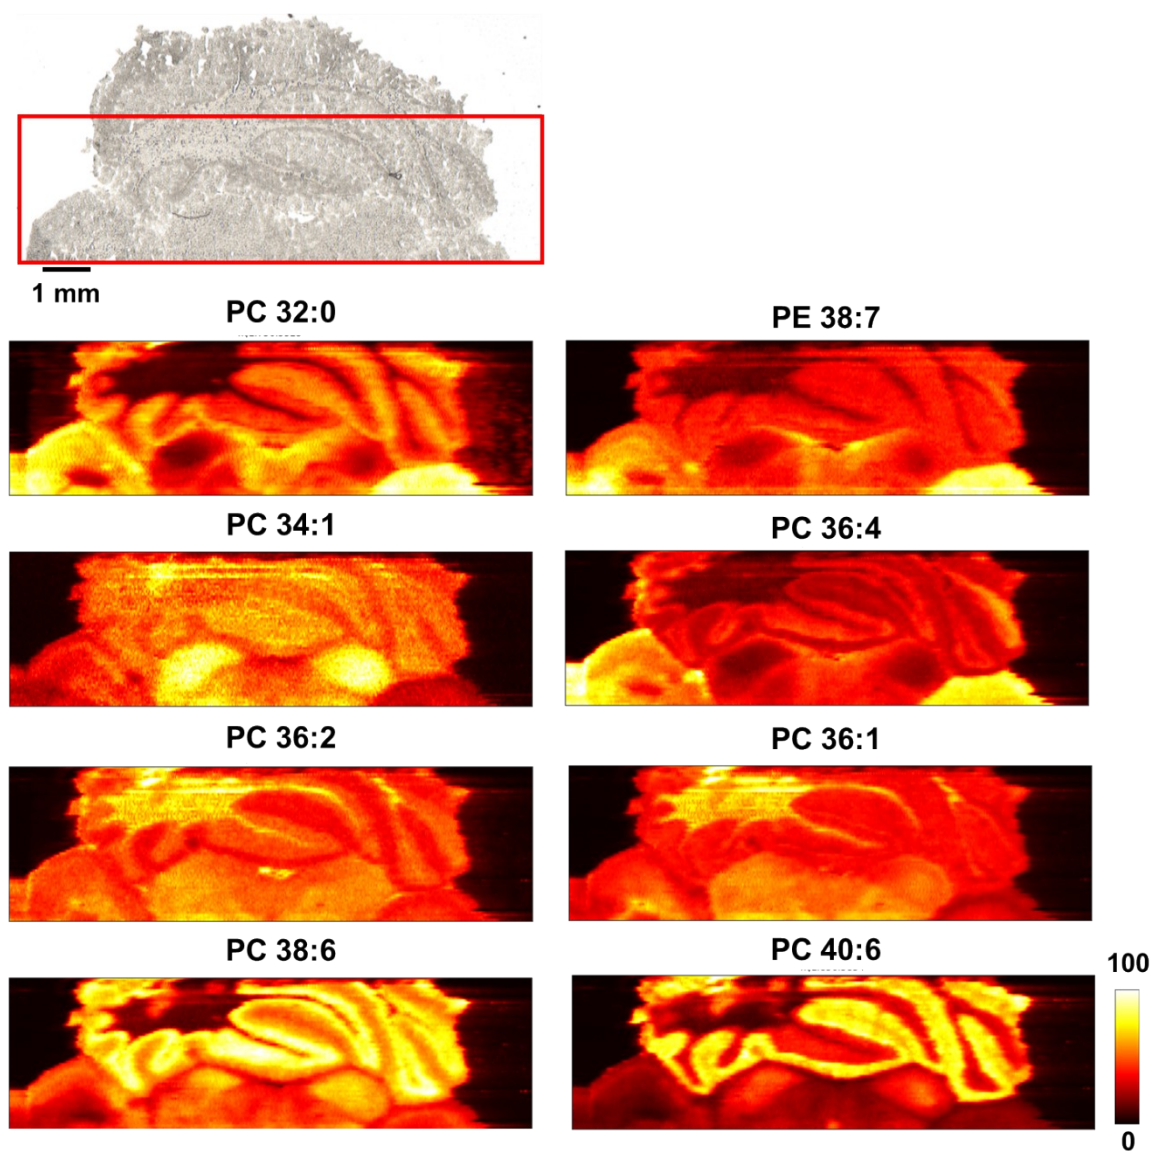

**Figure S4.** Optical image and representative positive ion images of  $[M+Na]^+$  ions of molecules in mouse brain tissue obtained using the V-shape SLE-MFP. The imaged sample area is marked with a red box as shown in the optical image. Scale bar: 1 mm; the intensity scale: black (low), yellow (high). The scan rate is  $200 \mu\text{m/s}$  and the step between lines is  $50 \mu\text{m}$ . The acquisition rate of MS is 10 Hz. The ion images are normalized to the TIC.
